# Supplementary figures and images for: Downstream Processing of Amorphous and Co-Amorphous Olanzapine Powder Blends
Source: MDPI journal article supplement (doi:10.3390/pharmaceutics14081535), 2022-07-23

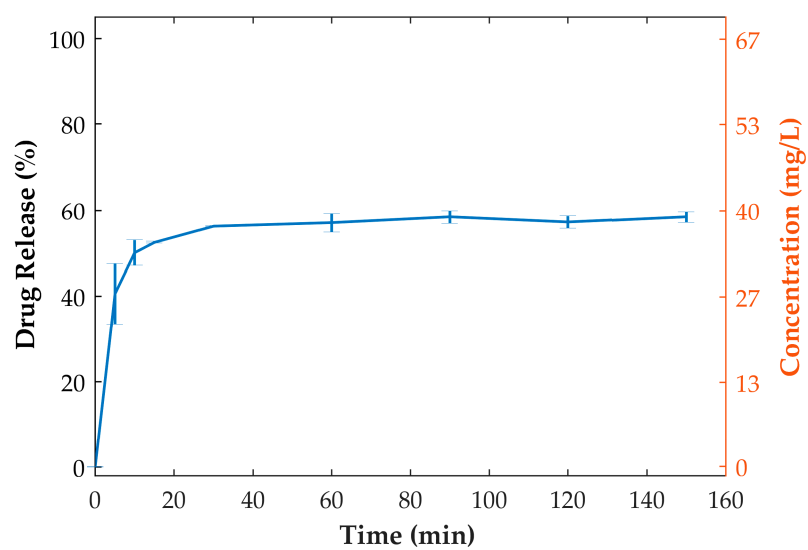

**Figure S1.** Dissolution profile of OLZ present in marketed tablets.

Supplement: s1 [file s1]
